# Supplementary material
Source: PubMed Central journal article supplement (PMC7282984)

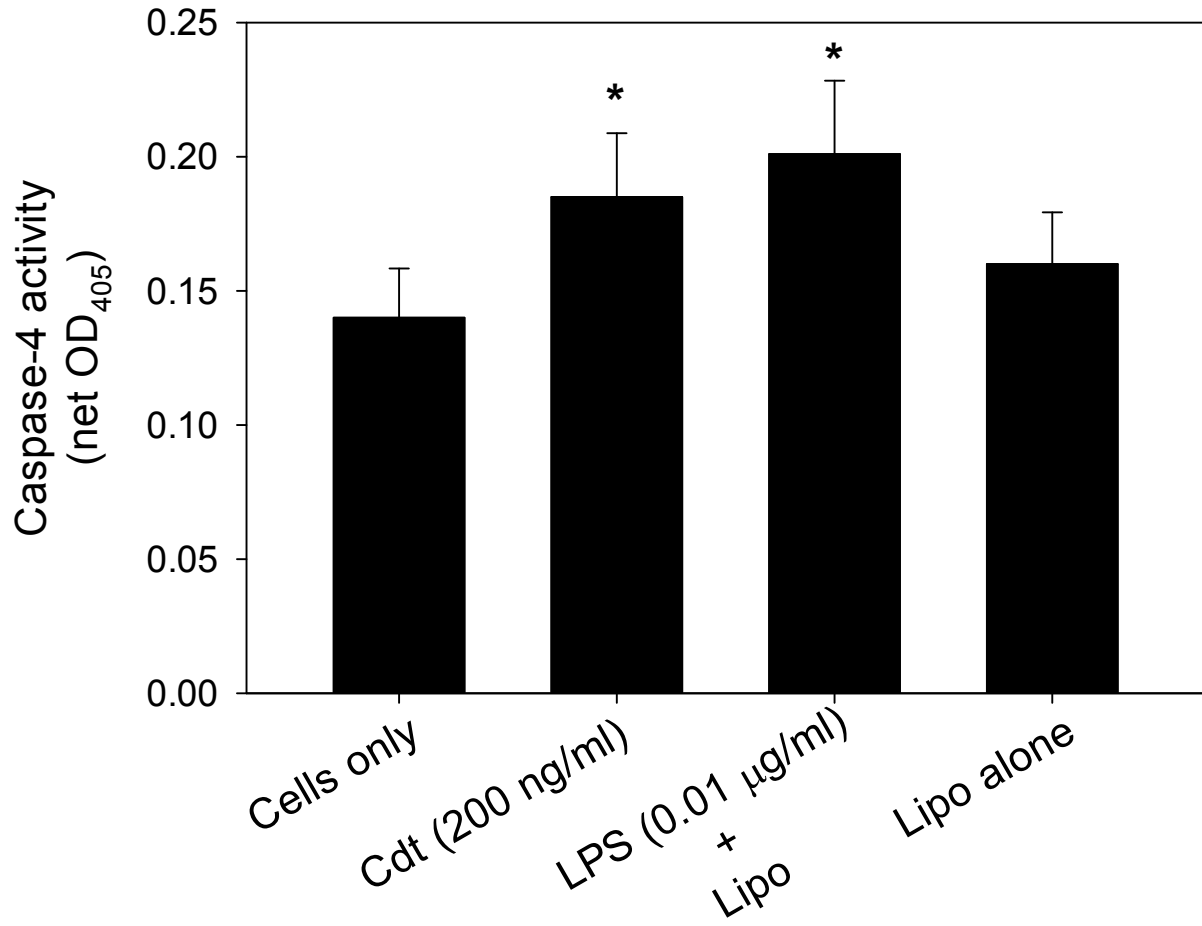

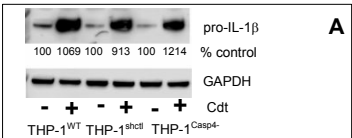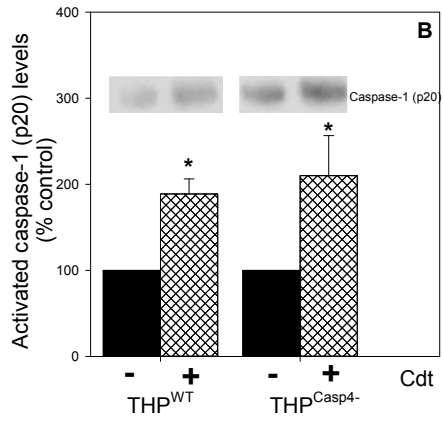

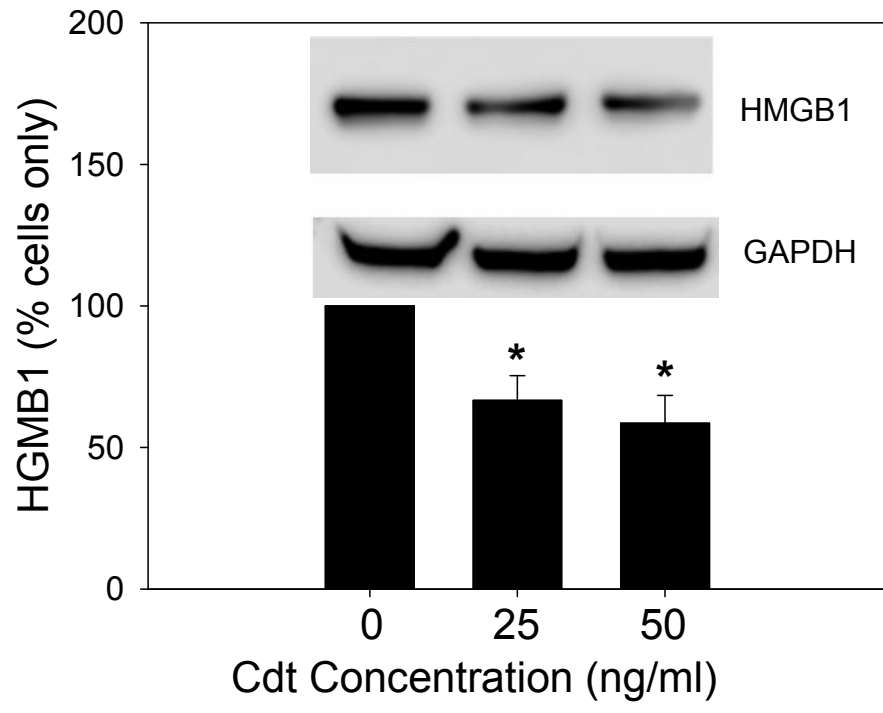

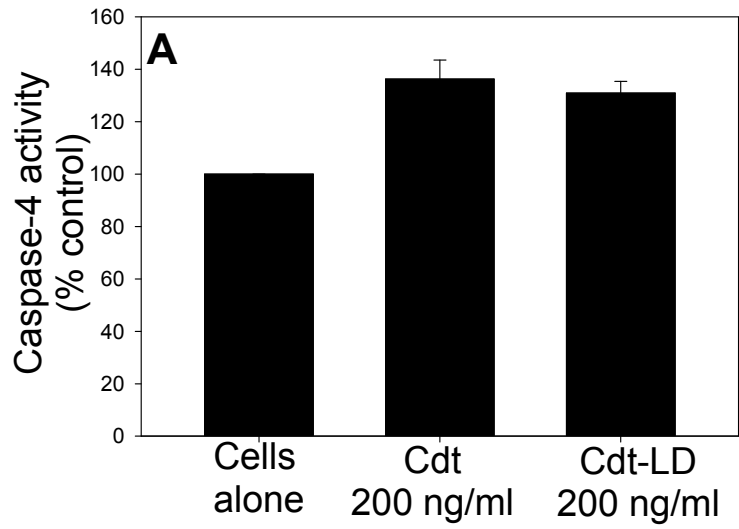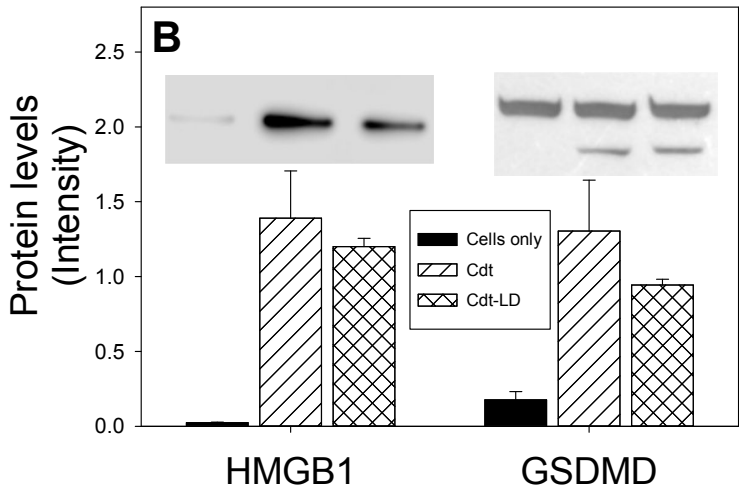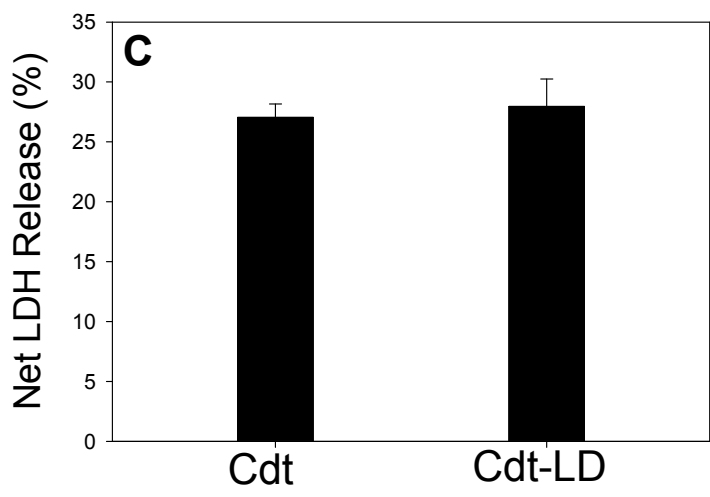

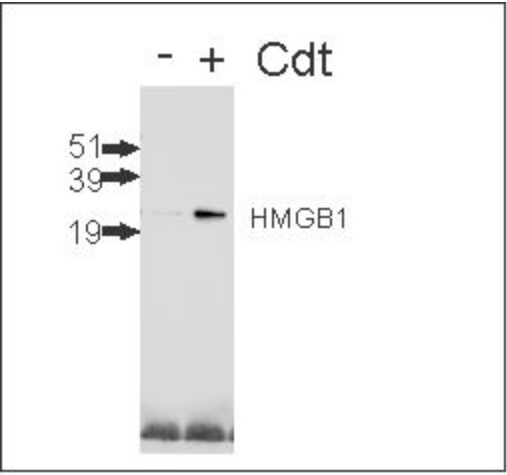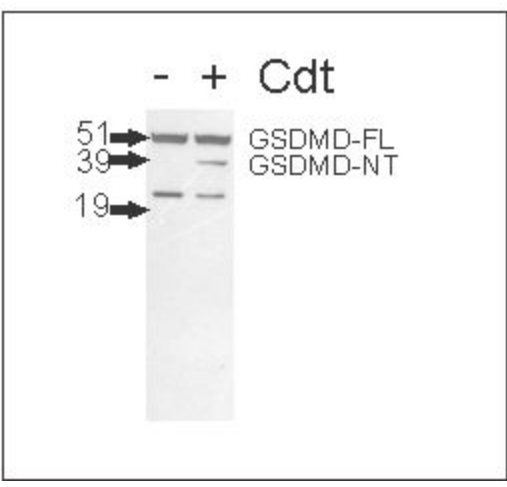

Supplement: NIHMS1562215-supplement-1.pdf [file NIHMS1562215-supplement-1.pdf]
